# Supplementary material for: Occurrence and Transport of Isothiazolinone-Type Biocides from Commercial Products to Aquatic Environment and Environmental Risk Assessment
Source: MDPI journal article supplement (doi:10.3390/ijerph19137777), 2022-06-24
Supplement: s1 [file s1]

## Supplementary Information

Occurrence and transport of isothiazolinone biocide from commercial products to aquatic environment and environmental risk assessment

Iuliana Paun, Florinela Pirvu, Vasile Ion Iancu, Florentina Laura Chiriac\*

National Research and Development Institute for Industrial Ecology – ECOIND, Drumul Podu Dambovitei 71-73, Sector 6, 060652, Bucharest, Romania

**Table S1.** Characteristics and Molecular Properties of the Target Compounds

| Compound | Molecular Formula                   | Molecular Weight | Log Kow |
|----------|-------------------------------------|------------------|---------|
| MIT      | C <sub>4</sub> H <sub>5</sub> NOS   | 115.15           | -0.49   |
| CMI      | C <sub>4</sub> H <sub>4</sub> ClNOS | 149.60           | 0.40    |
| BIT      | C <sub>7</sub> H <sub>5</sub> NOS   | 151.19           | 1.77    |
| OIT      | C <sub>11</sub> H <sub>19</sub> NOS | 213.34           | 2.45    |

**Table S2.** WWTPs and receiving rivers - locations and sample codification

| Locality        | WWTPs             |                                         |               |          | Receiving Rivers |             |          |
|-----------------|-------------------|-----------------------------------------|---------------|----------|------------------|-------------|----------|
|                 | Served population | Average daily flow (m <sup>3</sup> /zi) | Sample type   | Cod name | Name             | Sample type | Cod name |
| Targoviste (TG) | 79600             | 47606                                   | Influent      | IF TG    | Ialomita         | Upstream    | UP TG    |
|                 |                   |                                         | Effluent      | EF TG    |                  | Downstream  | DW TG    |
|                 |                   |                                         | Sewage sludge | SS TG    |                  |             |          |
| Galati (GL)     | 504000            | 224640                                  | Influent      | IF GL    | Siret            | Upstream    | UP GL    |
|                 |                   |                                         | Effluent      | EF GL    |                  | Downstream  | DW GL    |
|                 |                   |                                         | Sewage sludge | SS GL    |                  |             |          |
| Bucharest (B)   | 1830000           | 1028160                                 | Influent      | IF B     | Dambovita        | Upstream    | UP B     |
|                 |                   |                                         | Effluent      | EF B     |                  | Downstream  | DW B     |
|                 |                   |                                         | Sewage sludge | SS B     |                  |             |          |
| Iasi (IS)       | 793500            | 777600                                  | Influent      | IF IS    | Bahlui           | Upstream    | UP IS    |
|                 |                   |                                         | Effluent      | EF IS    |                  | Downstream  | DW IS    |
|                 |                   |                                         | Sewage sludge | SS IS    |                  |             |          |
| Valcea (VL)     | 110527            | 88128                                   | Influent      | IF VL    | Olt              | Upstream    | UP VL    |
|                 |                   |                                         | Effluent      | EF VL    |                  | Downstream  | DW VL    |
|                 |                   |                                         | Sewage sludge | SS LV    |                  |             |          |

**Table S3.** Inter-day and intra-day precision, the method recoveries, limit of detection (LOD) and limit of quantification (LOQ) values determined for commercial products

|     | RSD <sub>r</sub> , % | RSD <sub>r</sub> <sup>R</sup> , % | Rec, % | LOD  | LOQ  |
|-----|----------------------|-----------------------------------|--------|------|------|
| MIT | 1.12                 | 6.25                              | 89.7   | 0.13 | 0.35 |
| BIT | 1.37                 | 6.8                               | 88.3   | 0.13 | 0.37 |
| OIT | 1.75                 | 7.31                              | 91.4   | 0.06 | 0.18 |
| CMI | 1.44                 | 6.72                              | 88.2   | 0.24 | 0.66 |

**Table S4.** Inter-day and intra-day precision, the method recoveries, limit of detection (LOD) and limit of quantification (LOQ) values determined for environmental samples

| Analytes | wastewater           |                      |        |           |           | surface water        |                      |        |           |           | sewage sludge        |                      |        |                |                |
|----------|----------------------|----------------------|--------|-----------|-----------|----------------------|----------------------|--------|-----------|-----------|----------------------|----------------------|--------|----------------|----------------|
|          | RSD <sub>r</sub> , % | RSD <sub>R</sub> , % | Rec, % | LOD, µg/L | LOQ, µg/L | RSD <sub>r</sub> , % | RSD <sub>R</sub> , % | Rec, % | LOD, µg/L | LOQ, µg/L | RSD <sub>r</sub> , % | RSD <sub>R</sub> , % | Rec, % | LOD, µg/g d.w. | LOQ, µg/g d.w. |
| MIT      | 2.44                 | 7.02                 | 88.1   | 0.16      | 0.44      | 2.16                 | 5.73                 | 89.2   | 0.13      | 0.37      | 3.01                 | 7.65                 | 87.3   | 0.004          | 0.012          |
| BIT      | 2.65                 | 7.29                 | 87.7   | 0.15      | 0.41      | 2.22                 | 6.51                 | 88.9   | 0.15      | 0.42      | 3.23                 | 8.06                 | 86.5   | 0.008          | 0.022          |
| OIT      | 3.37                 | 8.12                 | 90.3   | 0.08      | 0.23      | 3.10                 | 6.96                 | 92.7   | 0.06      | 0.16      | 3.72                 | 9.74                 | 88.0   | 0.006          | 0.018          |
| CMI      | 3.16                 | 7.33                 | 89.2   | 0.26      | 0.74      | 2.71                 | 6.08                 | 90.3   | 0.23      | 0.65      | 3.53                 | 9.22                 | 87.2   | 0.012          | 0.033          |

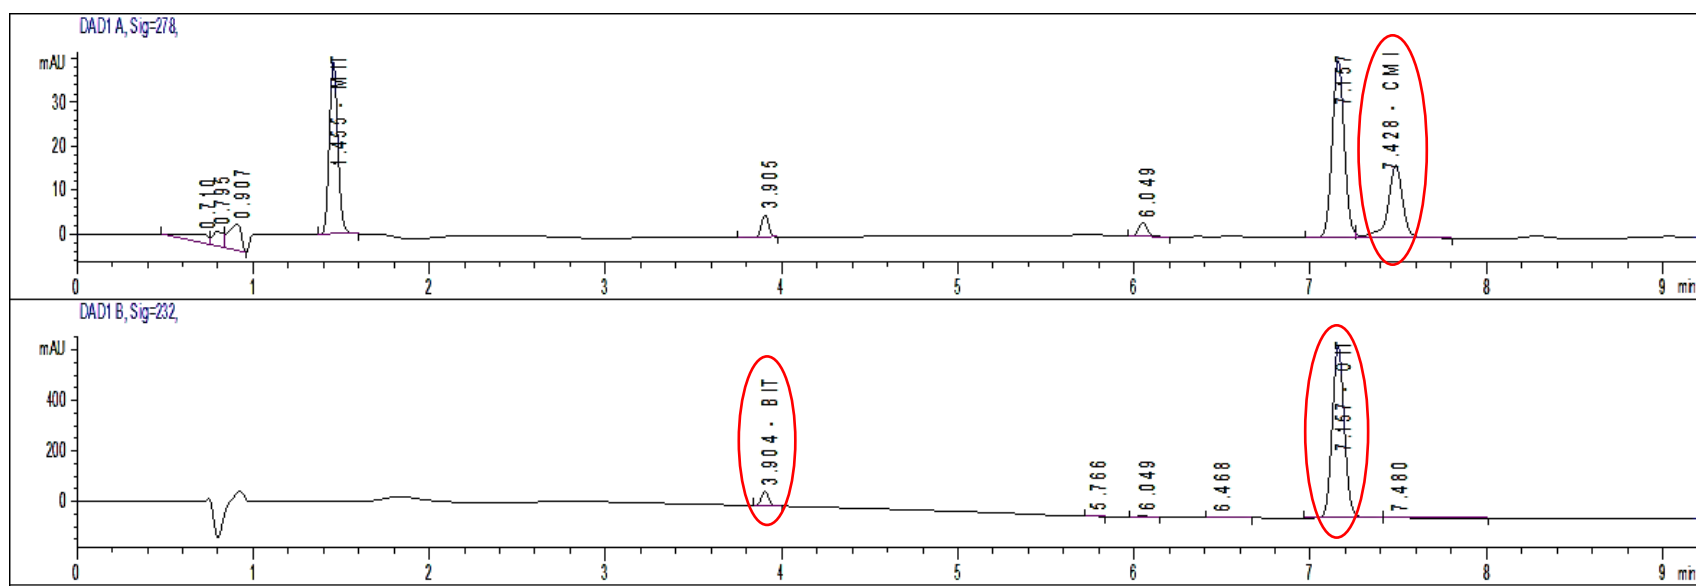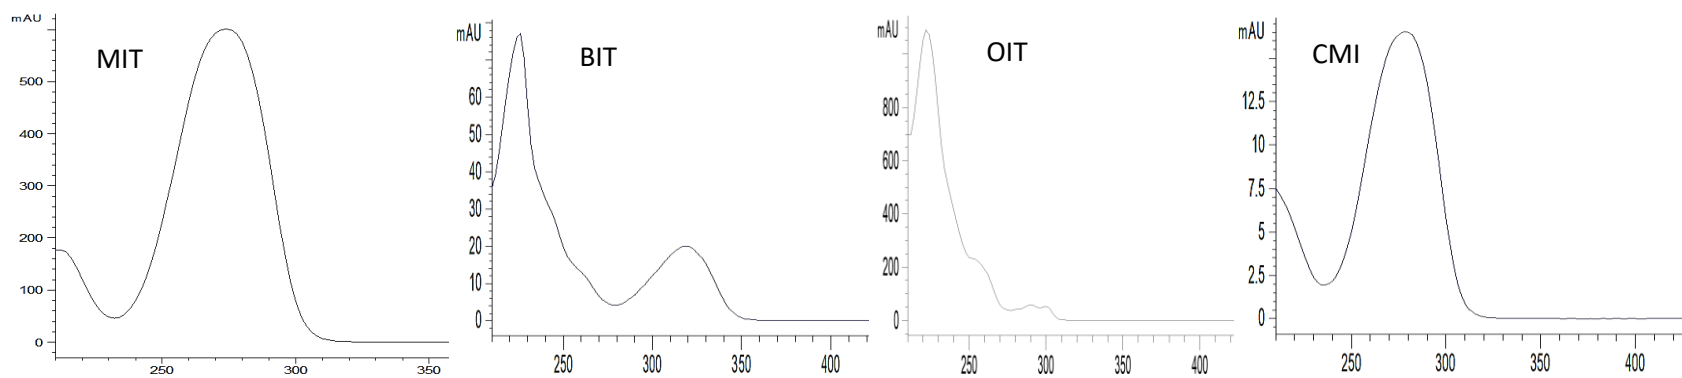

**Figure S1.** Chromatograms of 5 mg/L biocide standard mixture and their corresponding UV spectrum

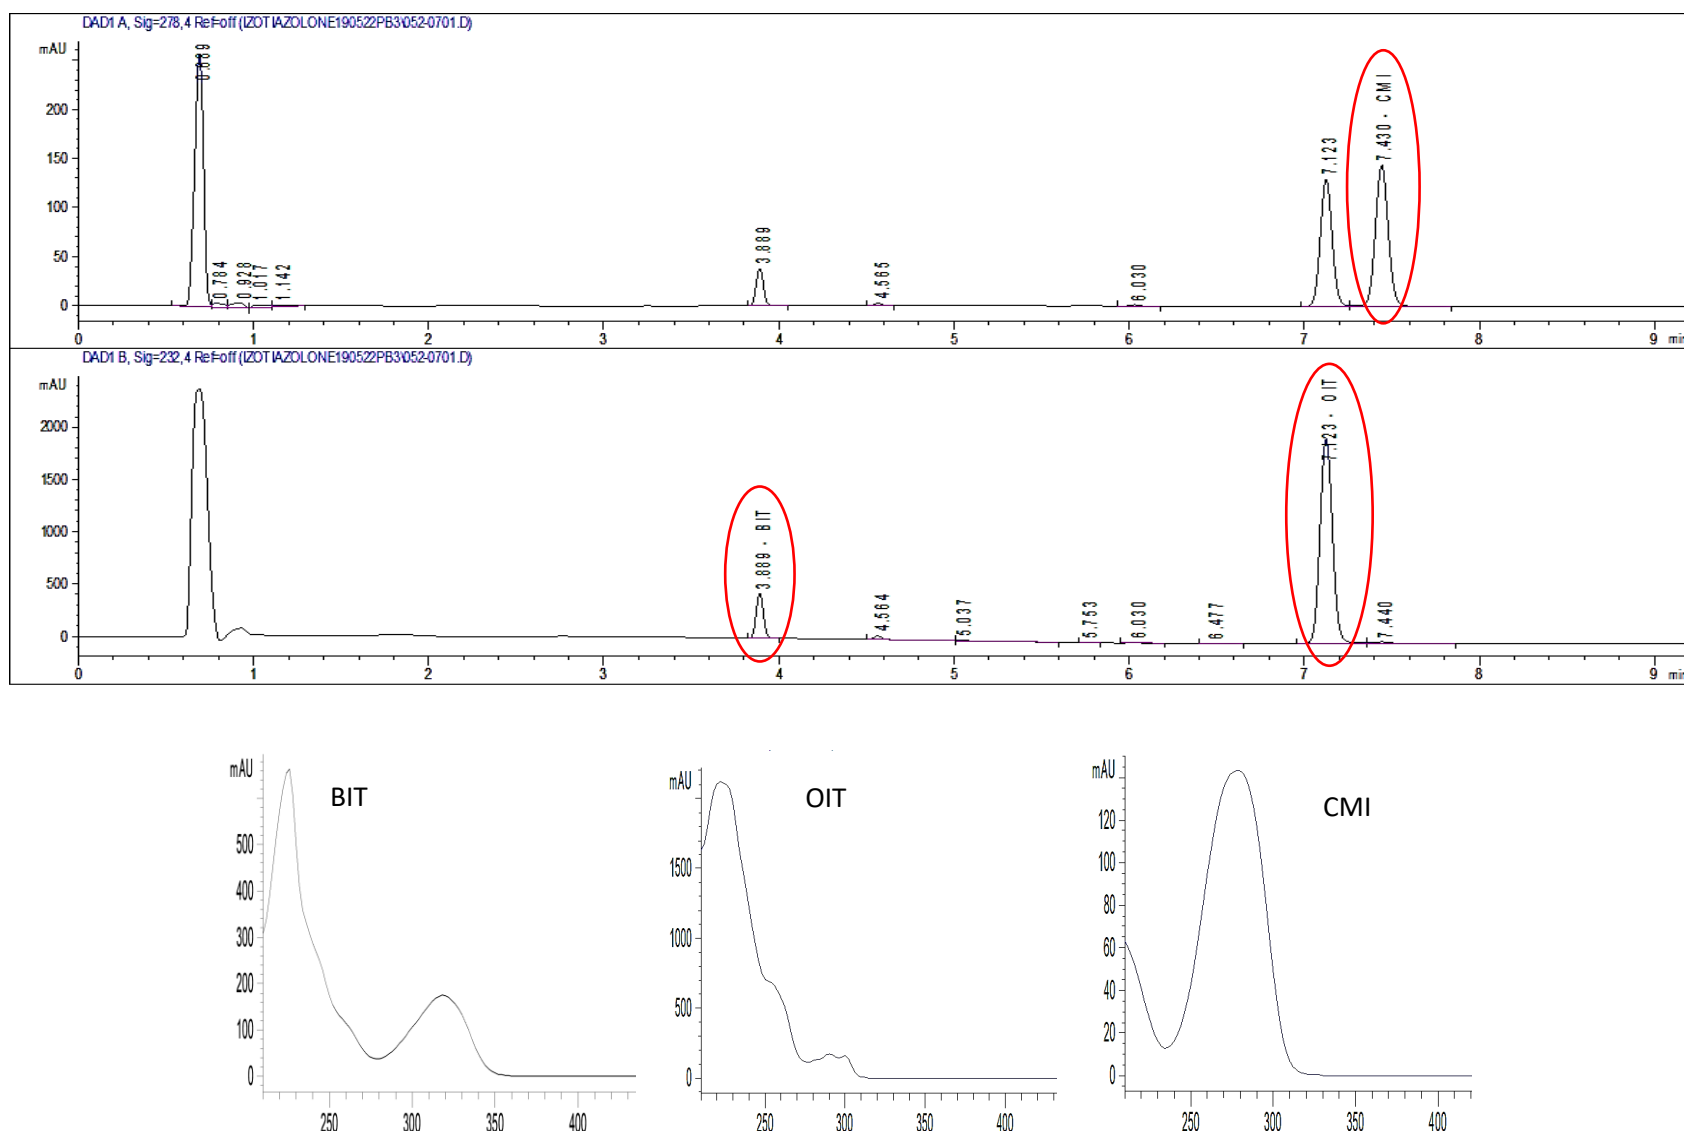

Figure S2. Chromatogram registered for DW VL sample and the corresponding UV spectrum for BIT, OIT and CMI

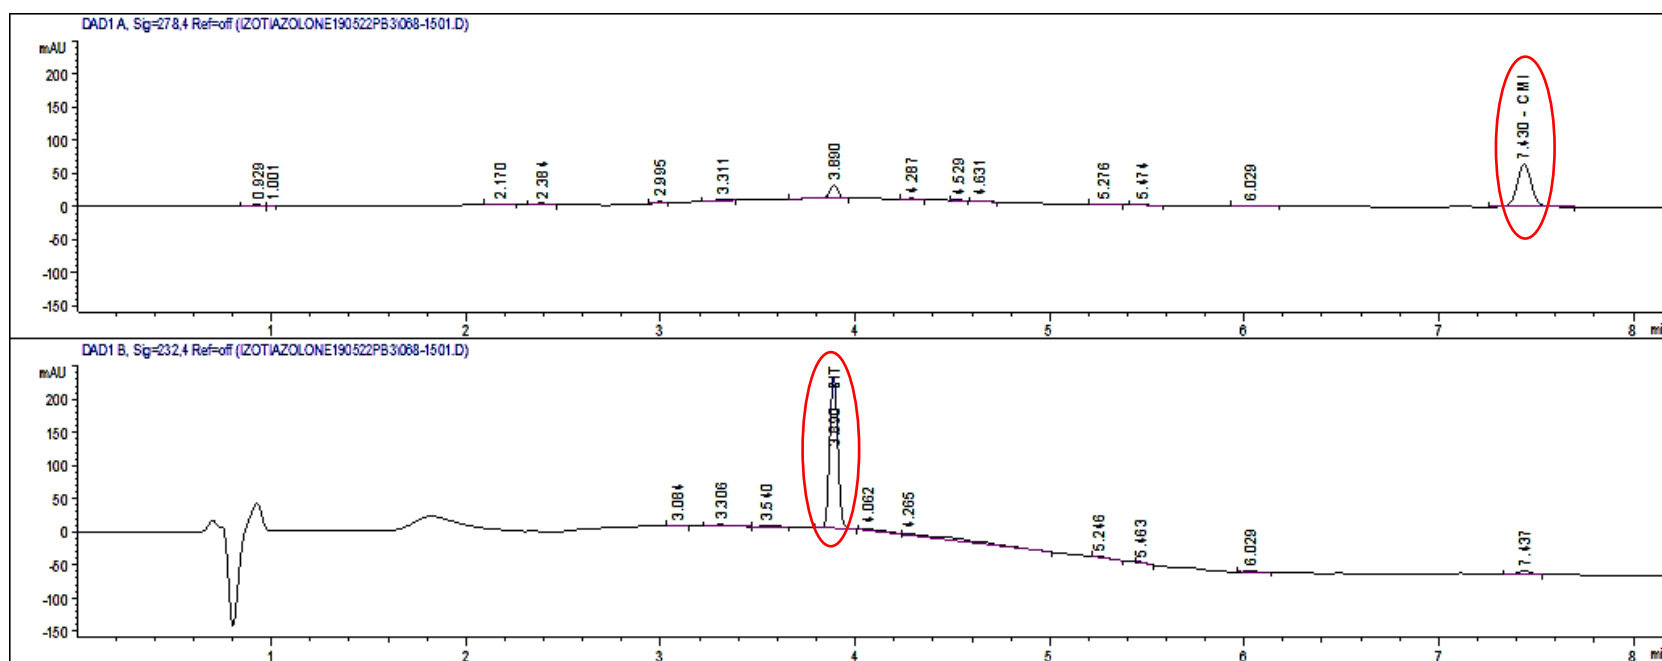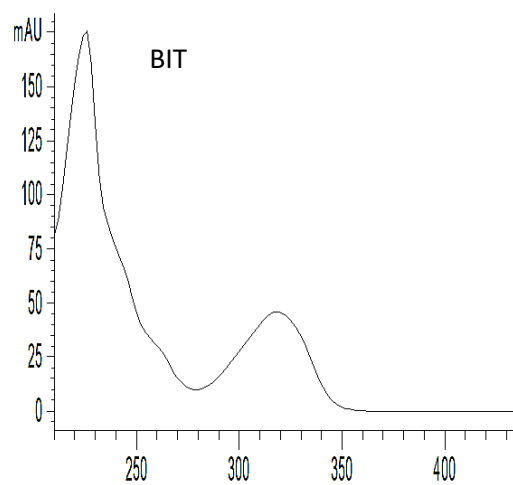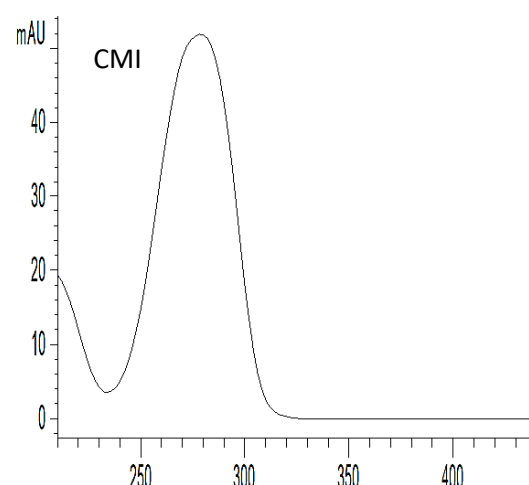

Figure S3. Chromatogram registered for EF VL sample and the corresponding UV spectrum for BIT and CMI

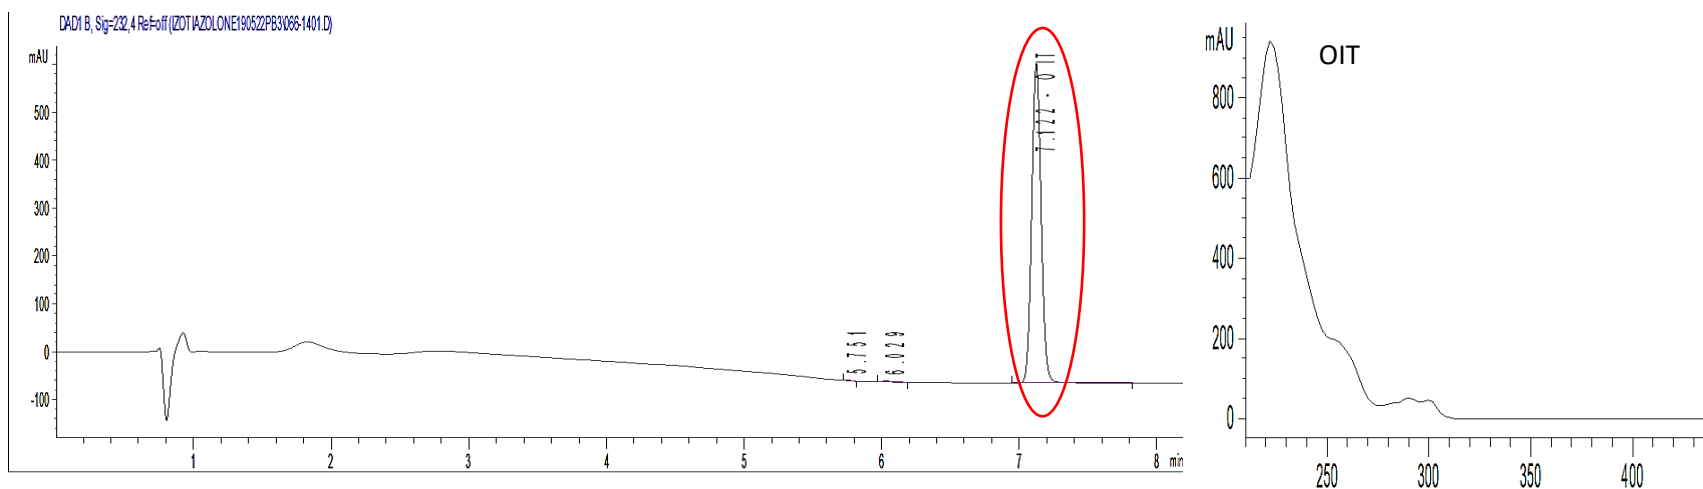

**Figure S4.** Chromatogram registered for SS GL sample and the corresponding UV spectrum for OIT

**Table S5.** Summary for the concentration levels (mg/L, mean  $\pm$  standard derivation, n=3 of 4 biocides in commercial products

| Commercial Products | MIT             | BIT             | OIT             | CMI             | Commercial Products | MIT             | BIT             | OIT             | CMI             |
|---------------------|-----------------|-----------------|-----------------|-----------------|---------------------|-----------------|-----------------|-----------------|-----------------|
| SG 1                | 6.49 $\pm$ 0.07 | 7.46 $\pm$ 0.10 | 21.1 $\pm$ 0.37 | 3.83 $\pm$ 0.06 | Sh 1                | <LOQ            | 6.77 $\pm$ 0.09 | <LOQ            | 0.66 $\pm$ 0.01 |
| SG 2                | 0.61 $\pm$ 0.01 | 7.21 $\pm$ 0.10 | 74.0 $\pm$ 1.30 | <LOQ            | Sh 2                | 0.63 $\pm$ 0.01 | 6.26 $\pm$ 0.09 | 12.9 $\pm$ 0.23 | <LOQ            |
| SG 3                | <LOQ            | 6.60 $\pm$ 0.09 | 67.8 $\pm$ 1.19 | 30.9 $\pm$ 0.45 | Sh 3                | 0.63 $\pm$ 0.01 | 7.38 $\pm$ 0.10 | <LOQ            | <LOQ            |
| SG 4                | <LOQ            | 7.71 $\pm$ 0.11 | <LOQ            | <LOQ            | Sh 4                | <LOQ            | 3.97 $\pm$ 0.05 | 0.59 $\pm$ 0.01 | 6.75 $\pm$ 0.10 |
| LS 1                | 0.58 $\pm$ 0.01 | 6.37 $\pm$ 0.09 | 65.4 $\pm$ 1.14 | <LOQ            | HC 1                | 0.51 $\pm$ 0.01 | 8.99 $\pm$ 0.12 | <LOQ            | <LOQ            |
| LS 2                | <LOQ            | 6.49 $\pm$ 0.09 | 66.7 $\pm$ 1.17 | <LOQ            | HC 2                | 0.64 $\pm$ 0.01 | 9.39 $\pm$ 0.13 | <LOQ            | 4.50 $\pm$ 0.06 |
| LS 3                | <LOQ            | 7.44 $\pm$ 0.10 | 76.4 $\pm$ 1.34 | <LOQ            | HC 3                | 0.56 $\pm$ 0.01 | 8.99 $\pm$ 0.12 | 11.7 $\pm$ 0.20 | <LOQ            |
| LS 4                | <LOQ            | 6.84 $\pm$ 0.09 | 70.3 $\pm$ 1.23 | 2.36 $\pm$ 0.03 | HC 4                | 0.50 $\pm$ 0.01 | 9.12 $\pm$ 0.12 | 10.8 $\pm$ 0.19 | 3.20 $\pm$ 0.05 |
| DS 1                | 0.65 $\pm$ 0.01 | 7.26 $\pm$ 0.10 | <LOQ            | 1.61 $\pm$ 0.02 |                     |                 |                 |                 |                 |
| DS 2                | 0.74 $\pm$ 0.01 | 6.64 $\pm$ 0.09 | <LOQ            | <LOQ            |                     |                 |                 |                 |                 |
| DS 3                | <LOQ            | 7.68 $\pm$ 0.11 | 0.77 $\pm$ 0.01 | 2.20 $\pm$ 0.03 |                     |                 |                 |                 |                 |
| DS 4                | <LOQ            | 6.48 $\pm$ 0.09 | <LOQ            | <LOQ            |                     |                 |                 |                 |                 |

**Table S6.** Summary for the concentration levels (mean  $\pm$  standard derivation, n=3) of 4 biocides in environmental samples

| Water samples | MIT  | BIT       | OIT       | CMI       | Sewage sludge samples | MIT       | BIT       | OIT       | CMI       |
|---------------|------|-----------|-----------|-----------|-----------------------|-----------|-----------|-----------|-----------|
|               | μg/L |           |           |           |                       | μg/g d.w. |           |           |           |
| IF VL         | ND   | 18.2±0.48 | 2.81±0.09 | 84.0±2.65 | SS VL                 | ND        | 0.53±0.02 | 4.72±0.18 | <LOQ      |
| IF IS         | ND   | <LOQ      | ND        | 34.8±1.10 | SS IS                 | ND        | <LOQ      | 5.19±0.19 | <LOQ      |
| IF B          | ND   | 22.9±0.61 | 0.91±0.03 | 26.8±0.85 | SS B                  | ND        | <LOQ      | 2.04±0.08 | <LOQ      |
| IF GL         | ND   | 36.9±0.98 | ND        | 15.4±0.49 | SS GL                 | ND        | <LOQ      | 5.80±0.22 | <LOQ      |
| IF TG         | ND   | 26.2±0.69 | ND        | 32.0±1.01 | SS TG                 | ND        | <LOQ      | 5.55±0.21 | 2.63±0.09 |
|               |      |           |           |           |                       |           |           |           |           |
| EF VL         | ND   | 6.58±0.17 | ND        | 18.5±0.59 |                       |           |           |           |           |
| EF IS         | ND   | <LOQ      | ND        | 13.5±0.43 |                       |           |           |           |           |
| EF B          | ND   | 5.93±0.16 | ND        | 14.9±0.47 |                       |           |           |           |           |
| EF GL         | ND   | 7.57±0.20 | ND        | 5.70±0.18 |                       |           |           |           |           |
| EF TG         | ND   | 6.91±0.18 | ND        | 12.5±0.40 |                       |           |           |           |           |
|               |      |           |           |           |                       |           |           |           |           |
| UP VL         | ND   | 47.5±1.06 | 23.9±0.74 | 112±3.05  |                       |           |           |           |           |
| UP IS         | ND   | <LOQ      | 26.6±0.82 | 105±2.84  |                       |           |           |           |           |
| UP B          | ND   | 36.6±0.81 | 29.1±0.90 | 45.5±1.23 |                       |           |           |           |           |
| UP GL         | ND   | 47.5±1.05 | 22.3±0.69 | 29.7±0.81 |                       |           |           |           |           |
| UP TG         | ND   | 41.8±0.93 | 9.19±0.28 | 2.36±0.06 |                       |           |           |           |           |
|               |      |           |           |           |                       |           |           |           |           |
| DW VL         | ND   | 81.1±1.80 | 24.3±0.75 | 144±3.91  |                       |           |           |           |           |
| DW IS         | ND   | 40.8±0.91 | 27.2±0.84 | 131±3.55  |                       |           |           |           |           |
| DW B          | ND   | 47.7±1.06 | 43.2±1.34 | 97.4±2.64 |                       |           |           |           |           |
| DW GL         | ND   | 55.1±1.22 | 24.1±0.75 | 55.3±1.50 |                       |           |           |           |           |
| DW TG         | ND   | 61.5±1.37 | 10.1±0.31 | 98.7±2.67 |                       |           |           |           |           |

**Table S7.** Toxicity data: Enf Point, Effect concentration, AF, PNEC

| Compound | Specie              | Nume                                          | Endpoint | Effect conc (mg/L) | Effect conc (ug/L) | AF    | PNEC (ug/L) | Ref  |
|----------|---------------------|-----------------------------------------------|----------|--------------------|--------------------|-------|-------------|------|
| BIT      | fish                | Oncorhynchus mykiss                           | LC50     | 0.167              | 167                | 1000  | 0.167       | [23] |
|          | Intervertebrates    | Daphnia Magna                                 | EC50     | 0.097              | 97                 | 1000  | 0.097       | [23] |
|          | Algae               | Selenastrum capricornutum                     | EC50     | 0.11               | 110                | 1000  | 0.11        | [23] |
|          | Algae               | Selenastrum capricornutum                     | NOEC     | 0.04               | 40                 | 100   | 0.4         | [23] |
|          | Bacteria            | Activated sludge respiration inhibition       | EC50     | 13                 | 13000              | 1000  | 13          | [23] |
|          |                     |                                               |          |                    |                    |       |             |      |
| CMI      | Algae               | Freshwater algal                              | EC50     | 0.089              | 89                 | 1000  | 0.089       | [24] |
|          | Bacteria            | Freshwater bacteria                           | EC50     | 0.086              | 86                 | 1000  | 0.086       | [24] |
|          |                     |                                               |          |                    |                    |       |             |      |
| OIT      | fish                | Oncorhynchus mykiss                           | LC50     | 0.047              | 47                 | 1000  | 0.047       | [25] |
|          | Fish                | Pimephales promelas                           | NOEC     | 0.0085             | 8.5                | 100   | 0.085       | [25] |
|          | Intervertebrates    | Daphnia Magna                                 | EC50     | 0.107              | 107                | 1000  | 0.107       | [25] |
|          | Intervertebrates    | Daphnia Magna                                 | NOEC     | 0.074              | 74                 | 100   | 0.74        | [25] |
|          | Algae               | Pseudokirchneriella subcapitata (green algae) | EC50     | 0.058              | 58                 | 1000  | 0.058       | [25] |
|          | Algae               | Pseudokirchneriella subcapitata (green algae) | NOEC     | 0.0014             | 1.4                | 10    | 0.14        | [25] |
|          | Bacteria            | Vibrio fischeri (bioluminescent bacteria)     | EC50     | 0.201              | 201                | 1000  | 0.201       | [25] |
|          | Marine invertebrate | Americamysis bahia (mysid shrimp)             | LC50     | 0.071              | 71                 | 1000  | 0.071       | [25] |
|          | Marine invertebrate | Americamysis bahia (mysid shrimp)             | NOEC     | 0.00063            | 0.63               | 100   | 0.0063      | [25] |
|          | Marine Mollusc      | Crassostrea virginica (oyster)                | EC50     | 0.013              | 13                 | 10000 | 0.0013      | [25] |

**Table S8.** Risk quotients derived from BIT and OIT

| Biocides | MEC UP mean (µg/L) | MEC EF mean (µg/L) | MEC DW mean (µg/L) | MEC UP max (µg/L) | MEC EF max (µg/L) | MEC DW max (µg/L) | Lowest NOEC (mg/L) | AF  | PNEC (µg/L) | RQ based on MEC UP mean | RQ based on MEC EF mean | RQ based on MEC DW mean | RQ based on MEC UP max | RQ based on MEC EF max | RQ based on MEC DW max |
|----------|--------------------|--------------------|--------------------|-------------------|-------------------|-------------------|--------------------|-----|-------------|-------------------------|-------------------------|-------------------------|------------------------|------------------------|------------------------|
| BIT      | 35                 | 5                  | 57                 | 48                | 8                 | 81                | 0.04               | 100 | 0.4         | 88                      | 13                      | 143                     | 120                    | 20                     | 203                    |
| OIT      | 22                 | 13                 | 105                | 112               | 19                | 144               | 0.0014             | 10  | 0.14        | 157                     | 93                      | 750                     | 800                    | 136                    | 1029                   |
